# Supplementary material
Source: publisher site journal article supplement (https://www.dovepress.com/article/346851)
Supplement: Supplementary file 1 [file get_supplementary_file.php]

**SUPPLEMENT**

**Supplementary Table S1: Associations between PESM-E before bedtime, short sleep duration and academic performance**

| Model | Path | Dependent Variable | Independent Variable | AOR | 95% CI | P |
| --- | --- | --- | --- | --- | --- | --- |
| 1 | *a* | Short sleep duration a | Pre-bedtime PESM-E b  (ref: Not pre-bedtime PESM-E) | 1.75 | 1.37-2.23 | <0.001 |
| 2 | *-* | Academic performance level | Short sleep duration a  (ref: Not short sleep duration) | 1.01 | 0.82-1.24 | 0.940 |
| 3 | *c* | Academic performance level | Pre-bedtime PESM-E b  (ref: Not pre-bedtime PESM-E) | 1.28 | 1.04-1.57 | 0.021 |
| 4 | *c ’* | Academic performance level | Pre-bedtime PESM-Eb  (ref: Not pre-bedtime PESM-E) | 1.28 | 1.04-1.58 | 0.021 |
| *b* | Short sleep duration a  (ref: Not short sleep duration) | 0.98 | 0.79-1.21 | 0.830 |

Notes: All models were adjusted for age, body mass index, gender, major, survey time, excessive daytime sleepiness, depressive symptoms and frequent playing of video games and watching of videos.

Path “*a*”: the effect of the independent variable on the proposed mediator. Path “*b*”: the effect of mediator on the dependent variable. Path “*c‘* ”: the direct effect of the independent variable on the dependent variable after controlling the mediator. Path “*c*”: the total effect of the independent variable on the dependent variable.

a Short sleep duration was defined as habitual total sleep time extracted from PSQI less than 7 hours.

b PESM-E before bedtime was defined as the use of electronic screen media for entertainment longer than 60 minutes/night after 10:00 p.m. during the past 6 months.

Abbreviations: PESM-E, prolonged electronic screen media use for entertainment; AOR, adjusted odds ratios; CI, confidence interval.

**Supplementary Table S2：Associations between PESM-E before bedtime, late bedtime and academic performance.**

| Model | Path | Dependent Variable | Independent Variable | AOR | 95% CI | P |
| --- | --- | --- | --- | --- | --- | --- |
| 1 | *a* | Late bedtime a | Pre-bedtime PESM-E b  (ref: Non pre-bedtime PESM-E) | 2.45 | 1.89-3.18 | <0.001 |
| 2 | *-* | Academic performance level | Late bedtime a  (ref: Non late bedtime) | 1.05 | 0.85-1.30 | 0.661 |
| 3 | *c* | Academic performance level | Pre-bedtime PESM-E b  (ref: Non pre-bedtime PESM-E) | 1.28 | 1.04-1.57 | 0.021 |
| 4 | *c ’* | Academic performance level | Pre-bedtime PESM-Eb  (ref: Non pre-bedtime PESM-E) | 1.28 | 1.03-1.58 | 0.024 |
| *b* | Late bedtime a  (ref: Non late bedtime) | 1.00 | 0.81-1.24 | 0.95 |

Notes: All models were adjusted for age, body mass index, gender, major, survey time, excessive daytime sleepiness, depressive symptoms and frequent playing of video games and watching of videos.

Path “*a*”: the effect of the independent variable on the proposed mediator. Path “*b*”: the effect of mediator on the dependent variable. Path “*c’*”: the direct effect of the independent variable on the dependent variable after controlling the mediator. Path “*c*”: the total effect of the independent variable on the dependent variable.

a Late bedtime was defined as habitual bedtime extracted from PSQI later than 00:00 a.m.

b PESM-E before bedtime was defined as the use of electronic screen media for entertainment longer than 60 minutes/night after 10:00 p.m. during the past 6 months.

Abbreviations: PESM-E, prolonged electronic screen media use for entertainment; AOR, adjusted odds ratios; CI, confidence interval.
